# Supplementary material for: Silver(I) Complexes of the Pharmaceutical Agents Metronidazole and 4-Hydroxymethylpyridine: Comparison of Cytotoxic Profile for Potential Clinical Application
Source: PubMed Central journal article supplement (PMC6572996; doi:10.3390/molecules24101949), 2019-05-21
Supplement: molecules-24-01949-s001.pdf [file molecules-24-01949-s001.pdf]

Article

# Silver(I) Complexes of the Pharmaceutical Agents Metronidazole and 4-Hydroxymethylpyridine: Comparison of Cytotoxic Profile for Potential Clinical Application

Lidia Radko <sup>1</sup>, Sylwia Stypuła-Trębas <sup>1</sup>, Andrzej Posyński <sup>1</sup>, Dominik Żyro <sup>2</sup> and Justyn Ochocki <sup>2\*</sup>

<sup>1</sup> Department of Pharmacology and Toxicology, National Veterinary Research Institute, Partyzantów 57, 24-100 Puławy, Poland; lidia@piwet.pulawy.pl (L.R.); sylwia@piwet.pulawy.pl (S.S.-T.); aposyniak@piwet.pulawy.pl (A.P.)

<sup>2</sup> Department of Bioinorganic Chemistry, Chair of Medicinal Chemistry, Medical University of Lodz, Muszyńskiego 1, 90-151 Łódź, Poland; dominik.zyro@umed.lodz.pl

\* Correspondence: justyn.ochocki@umed.lodz.pl; Tel.: +48-42-6779-220

## Contents:

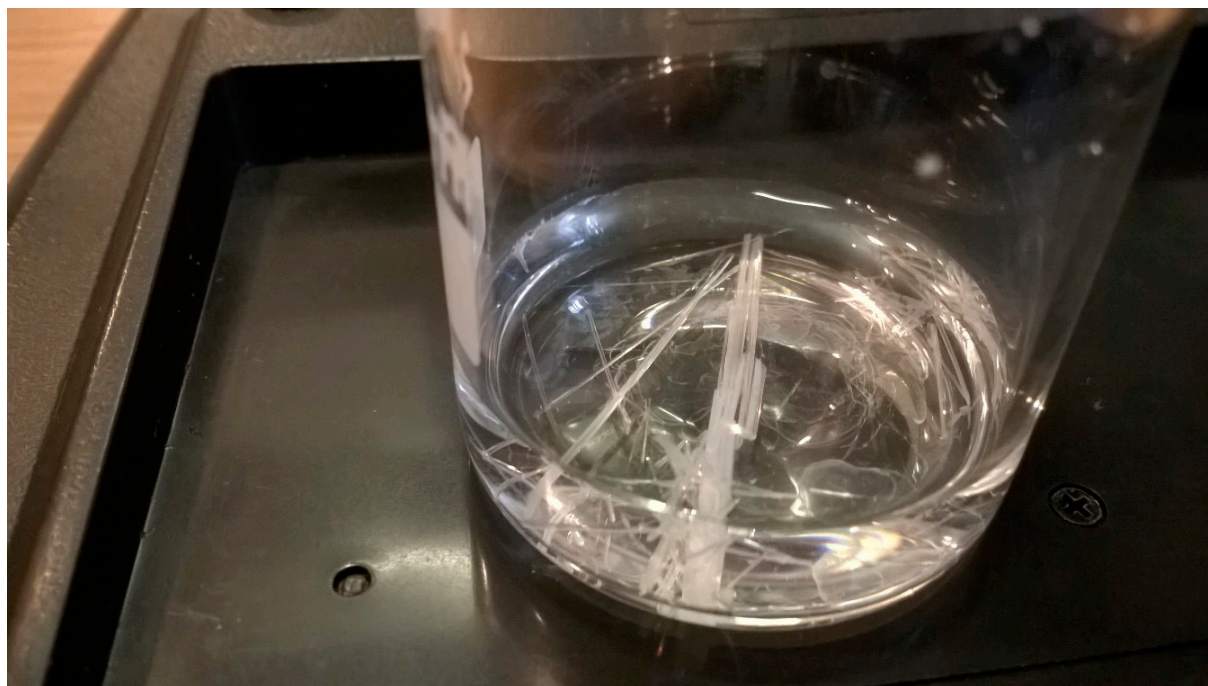

**Figure S1.** Photograph of silver(I) complex of metronidazole obtained as a result of one-step synthesis.

## Balb/c 3T3

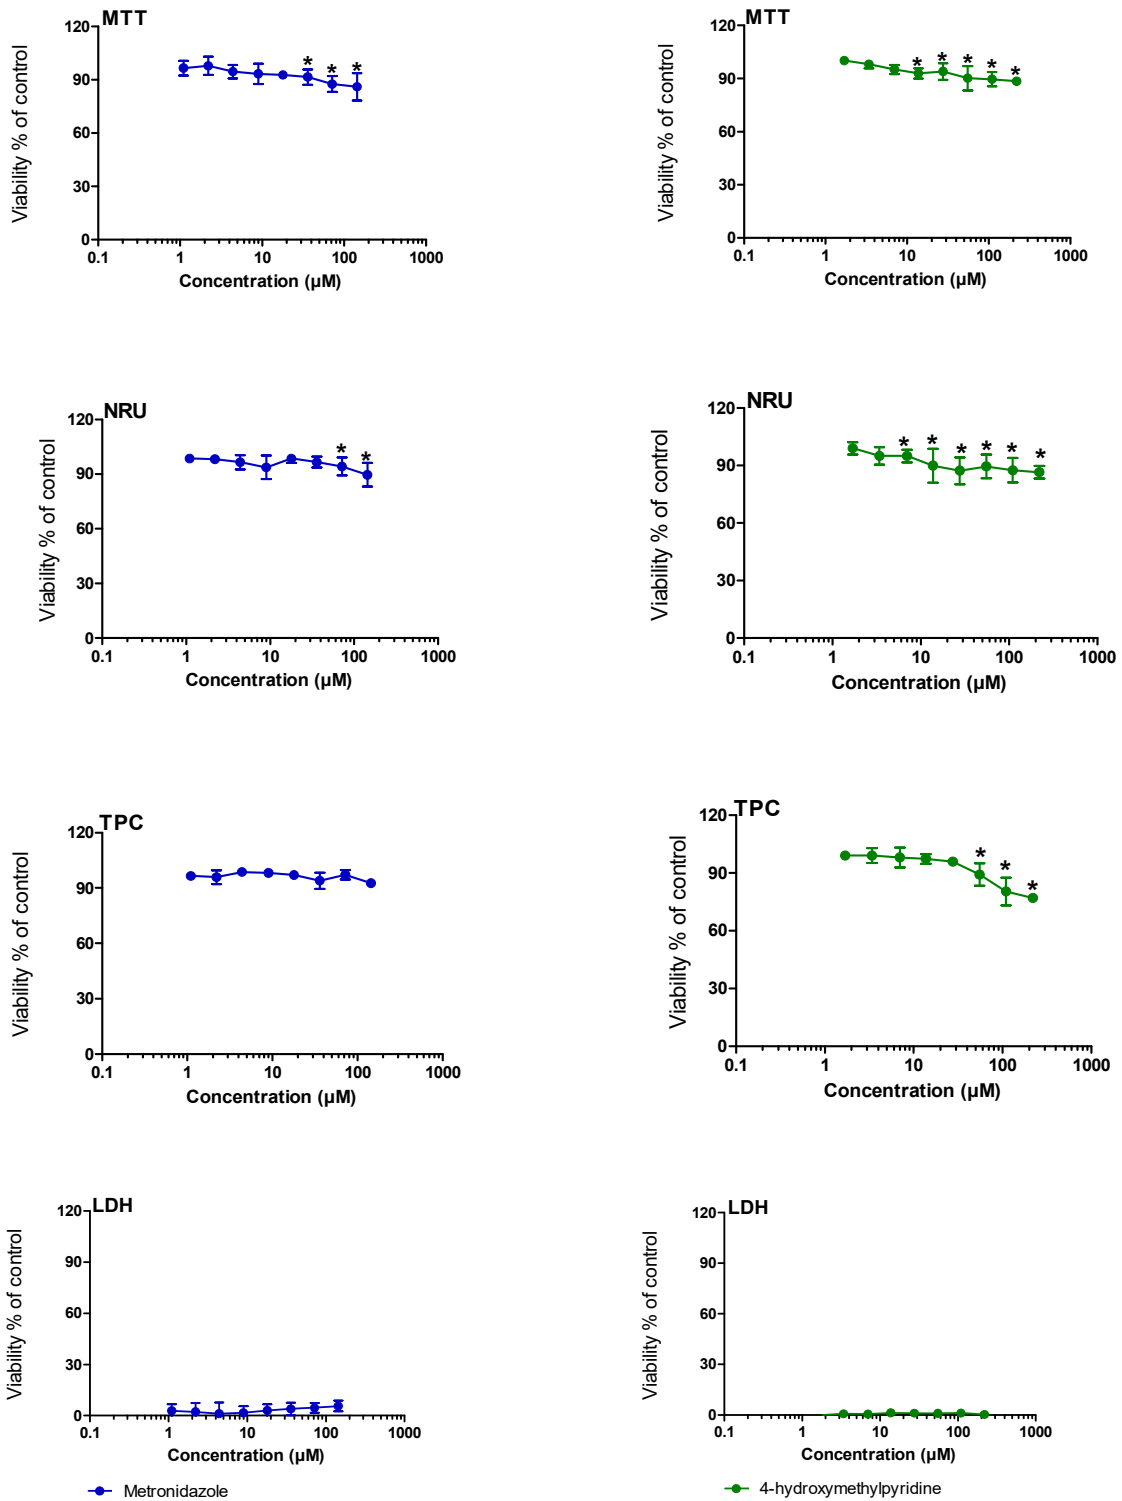

**Figure S2.** Concentration-dependent response curves for metronidazole and 4-hydroxymethylpyridine assessed by MTT, NRU, TPC, and LDH assays on Balb/c 3T3 cells. The results are expressed as the mean  $\pm$  SD of three independent experiments. \*  $p \leq 0.05$  in comparison with negative control (0.1% DMSO).

# HepG2

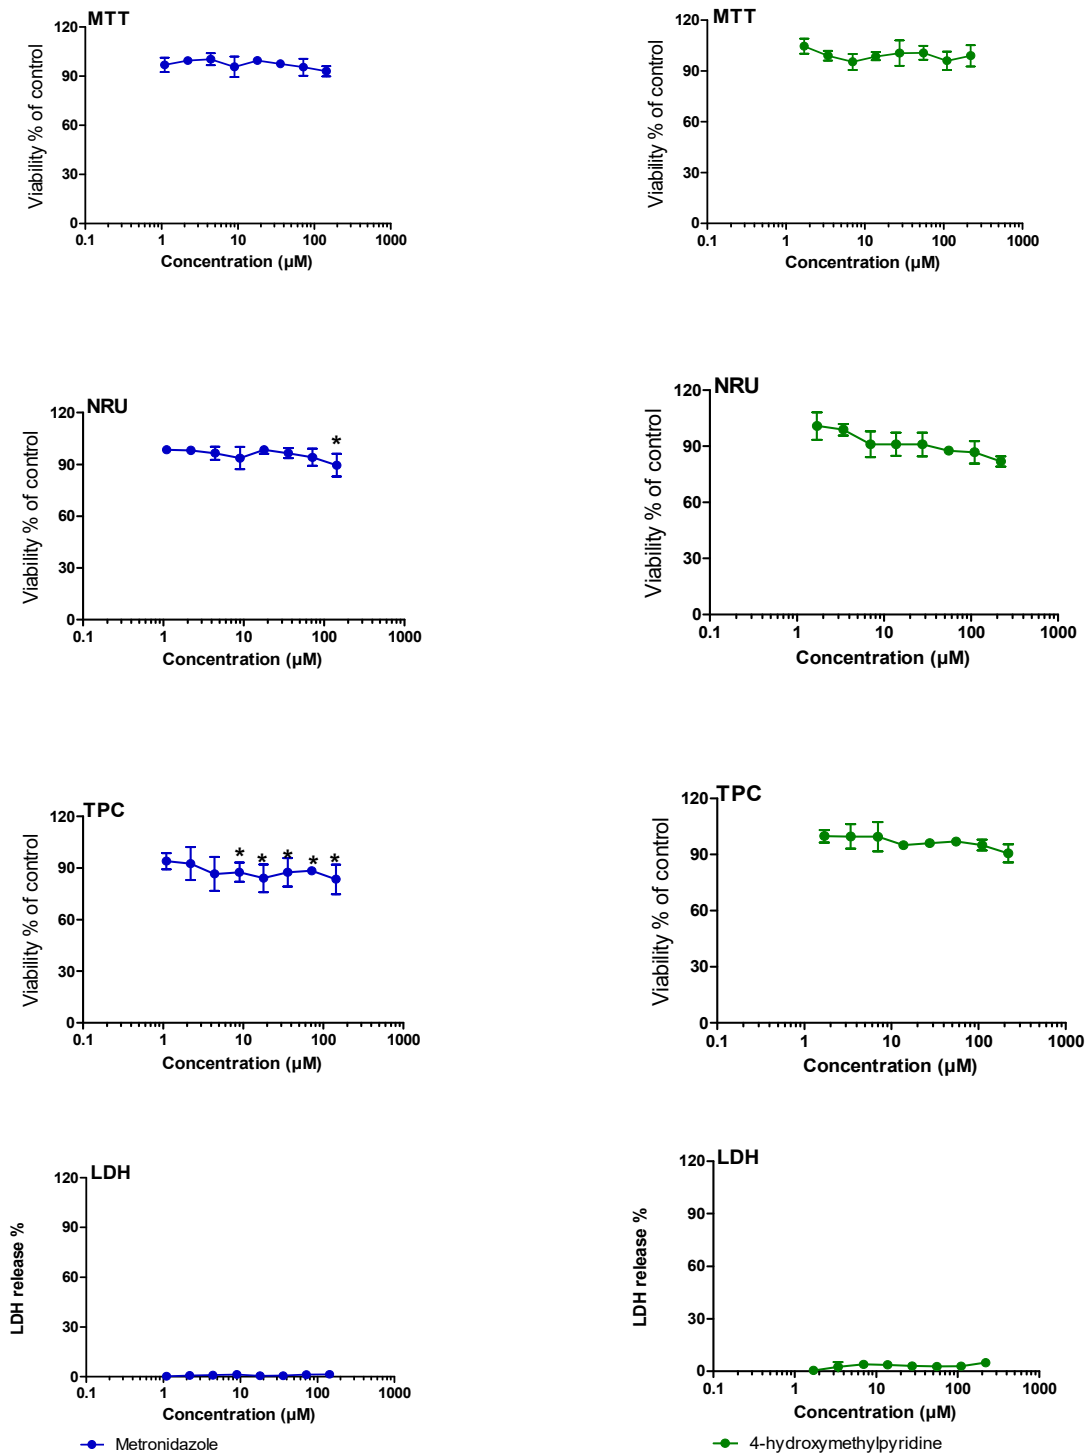

**Figure S3.** Concentration-dependent response curves for metronidazole and 4-hydroxymethylpyridine assessed by MTT, NRU, TPC, and LDH assays on HepG2 cells. The results are expressed as the mean  $\pm$  SD of three independent experiments. \*  $p \leq 0.05$  in comparison with negative control (0.1% DMSO).
